# Supplementary material for: Sweep Sampling Comparison of Terrestrial Insect Communities Associated with Herbaceous Stratum in the Riparian Zone of the Miho River, Korea
Source: MDPI journal article supplement (doi:10.3390/insects13060497), 2022-05-25
Supplement: s1 [file s1]

**Table S1.** Matching information and rates of insect herbivore host plant and vascular plant flora of the sites

| Terrestrial herbivorous insects                                            | Host plants referred                                                                  | <i>Chenopodium<br/>album</i> 20 | <i>Beckmannia<br/>syzigachne</i><br>2020 | <i>Beckmannia<br/>syzigachne</i><br>2021 | <i>Artemisia<br/>indica</i><br>2020 | <i>Artemisia<br/>indica</i><br>2021 |
|----------------------------------------------------------------------------|---------------------------------------------------------------------------------------|---------------------------------|------------------------------------------|------------------------------------------|-------------------------------------|-------------------------------------|
| <i>Cardipennis sulcithorax</i> (Hustache, 1916)                            | <i>Humulus japonicus</i> [44]                                                         | 0                               | 3                                        | 0                                        | 6                                   | 0                                   |
| <i>Psallus</i> ( <i>Calopsallus</i> ) <i>clarus</i> Kerzhner, 1988         | <i>Quercus dentata</i> [41]                                                           | 0                               | 0                                        | 0                                        | 1                                   | 0                                   |
| <i>Dryodurgades lamellaris</i> Vilbaste, 1968                              | <i>Pteridium aquilinum</i> var. <i>latiusculum</i> and<br><i>Pueraria lobata</i> [59] | 0                               | 0                                        | 0                                        | 0                                   | 4                                   |
| Tephritidae sp.                                                            | unknown                                                                               | 0                               | 0                                        | 1                                        | 0                                   | 0                                   |
| <i>Metalimnus steini</i> (Fieber, 1869)                                    | unknown                                                                               | 0                               | 0                                        | 1                                        | 0                                   | 0                                   |
| <i>Corythucha marmorata</i> Uhler, 1878                                    | polyphagy [55]                                                                        | 0                               | 1                                        | 3                                        | 0                                   | 58                                  |
| <i>Ziczacella steggerdai</i> (Ross, 1965)                                  | <i>Humulus japonicus</i> [53]                                                         | 0                               | 11                                       | 3                                        | 0                                   | 0                                   |
| <i>Eucera</i> ( <i>Eucera</i> ) <i>sociabilis</i> (Smith, 1873)            | Assumed polyphagy                                                                     | 0                               | 0                                        | 0                                        | 0                                   | 1                                   |
| <i>Stigmatonotum rufipes</i> (Motschulsky, 1866)                           | Collected on <i>Hypericum japonicum</i> [62]                                          | 0                               | 1                                        | 0                                        | 0                                   | 1                                   |
| <i>Macrosteles brunnescens</i> Anufriev, 1968                              | unknown                                                                               | 0                               | 0                                        | 0                                        | 0                                   | 10                                  |
| <i>Acanthocoris sordidus</i> (Thunberg, 1783)                              | Solanaceae and Convolvulaceae [41]                                                    | 0                               | 0                                        | 0                                        | 0                                   | 2                                   |
| Apidae sp.                                                                 | assumed polyphagy                                                                     | 0                               | 0                                        | 0                                        | 0                                   | 1                                   |
| <i>Agapanthia</i> ( <i>Epopetes</i> ) <i>amurensis</i> Kraatz, 1879        | Asteraceae [59]                                                                       | 0                               | 0                                        | 0                                        | 0                                   | 1                                   |
| <i>Cassida nebulosa</i> Linnaeus, 1758                                     | <i>Chenopodium album</i> , <i>Chenopodium album</i><br>var. <i>centrorubrum</i> [42]  | 2                               | 0                                        | 0                                        | 0                                   | 0                                   |
| <i>Goniagnathus</i> ( <i>Epitephra</i> ) <i>rugulosus</i> (Haupt,<br>1917) | unknown                                                                               | 0                               | 0                                        | 0                                        | 1                                   | 2                                   |
| <i>Polymerus</i> ( <i>Polymerus</i> ) <i>amurensis</i> Kerzhner,<br>1988   | unknown                                                                               | 0                               | 5                                        | 0                                        | 0                                   | 0                                   |
| <i>Austroasca vittata</i> (Lethierry, 1884)                                | Genus <i>Artemisia</i> [58]                                                           | 0                               | 0                                        | 0                                        | 776                                 | 625                                 |
| <i>Plagiognathus yomogi</i> Miyamoto, 1969                                 | <i>Artemisia indica</i> [41]                                                          | 0                               | 0                                        | 0                                        | 0                                   | 31                                  |
| <i>Pachygrontha antennata</i> (Uhler, 1860)                                | Poaceae [41]                                                                          | 1                               | 0                                        | 0                                        | 0                                   | 1                                   |
| <i>Orthezia urticae</i> (Linnaeus, 1758)                                   | Asteraceae [59]                                                                       | 0                               | 0                                        | 0                                        | 29                                  | 0                                   |
| <i>Eysarcoris gibbosus</i> Jakovlev, 1904                                  | <i>Leonurus japonicus</i> [41]                                                        | 0                               | 0                                        | 1                                        | 0                                   | 0                                   |
| <i>Nakaharanus sagittarius</i> Kwon and Lee,<br>1979                       | unknown                                                                               | 0                               | 0                                        | 0                                        | 0                                   | 3                                   |
| <i>Galerucella</i> ( <i>Galerucella</i> ) <i>grisea</i> (Joannis,<br>1865) | <i>Persicaria thunbergii</i> , <i>Rumex crispus</i> ,<br>Genus <i>Persicaria</i> [42] | 1                               | 0                                        | 0                                        | 0                                   | 0                                   |

|                                                                      |                                                             |    |    |    |     |     |
|----------------------------------------------------------------------|-------------------------------------------------------------|----|----|----|-----|-----|
| <i>Cicadella viridis</i> (Linnaeus, 1758)                            | Polyphagy [59]                                              | 0  | 0  | 0  | 0   | 1   |
| Cicadellidae sp. 1                                                   | unknown                                                     | 0  | 0  | 0  | 0   | 25  |
| Cicadellidae sp. 2                                                   | unknown                                                     | 0  | 0  | 0  | 0   | 2   |
| Cicadellidae sp. 3                                                   | unknown                                                     | 0  | 0  | 0  | 0   | 1   |
| Cicadellidae sp. 4                                                   | unknown                                                     | 0  | 0  | 3  | 0   | 0   |
| Cicadellidae sp. 5                                                   | unknown                                                     | 0  | 0  | 2  | 0   | 0   |
| <i>Piesma capitatum</i> (Wolff, 1804)                                | Other <i>Piesma</i> species' host is<br>Chenopodiaceae [53] | 16 | 0  | 0  | 0   | 0   |
| <i>Orthotylus flavosparsus</i> (Sahlberg, 1841)                      | Chenopodiaceae [41]                                         | 83 | 5  | 0  | 0   | 0   |
| <i>Dorytomus (Dorytomus) imbecillus</i> Faust,<br>1883               | Genus <i>Salix</i> [59]                                     | 0  | 17 | 29 | 0   | 0   |
| <i>Plagiognathus amurensis</i> Reuter, 1883                          | Polyphagy [41]                                              | 23 | 28 | 1  | 18  | 0   |
| <i>Europiella artemisiae</i> (Becker, 1864)                          | <i>Artemisia indica</i> [41]                                | 0  | 1  | 0  | 207 | 419 |
| <i>Taylorilygus apicalis</i> (Fieber, 1861)                          | Polyphagy but prefer Asteraceae [41]                        | 0  | 0  | 0  | 0   | 12  |
| <i>Lema (Lema) concinnipennis</i> Baly, 1865                         | <i>Commelina communis</i> [42]                              | 0  | 1  | 0  | 0   | 0   |
| <i>Plagiodera versicolora</i> (Laicharting, 1781)                    | <i>Salix koreensis</i> [42]                                 | 0  | 0  | 2  | 0   | 0   |
| <i>Chrysomela vigintipunctata vigintipunctata</i><br>(Scopoli, 1763) | <i>Salix koreensis</i> [42]                                 | 0  | 0  | 1  | 0   | 0   |
| Chrysomelidae sp.                                                    | unknown                                                     | 0  | 0  | 3  | 0   | 17  |
| <i>Lissorhoptrus oryzophilus</i> Kuschel, 1952                       | Poaceae, Cyperaceae [56]                                    | 0  | 1  | 0  | 0   | 1   |
| <i>Chlorops oryzae</i> Matsumura, 1915                               | Poaceae [63]                                                | 0  | 10 | 8  | 0   | 45  |
| <i>Geotomus convexus</i> Hsiao, 1977                                 | Assumed polyphagy                                           | 0  | 0  | 1  | 0   | 0   |
| <i>Dorytomus (Dorytomus) roelofsi</i> Faust, 1882                    | Genus <i>Salix</i> [45]                                     | 0  | 0  | 1  | 0   | 0   |
| <i>Rhopalus (Aeschyntelus) maculatus</i> (Fieber,<br>1837)           | Polyphagy [41]                                              | 0  | 0  | 0  | 1   | 0   |
| <i>Fleutiauxia armata</i> (Baly, 1874)                               | <i>Cudrania tricuspidata</i> [42]                           | 0  | 1  | 0  | 0   | 0   |
| <i>Cletus punctiger</i> (Dallas, 1852)                               | Polyphagy [41]                                              | 1  | 0  | 0  | 0   | 0   |
| <i>Chrysolina (Anopachys) aurichalcea</i><br>(Mannerheim, 1825)      | <i>Artemisia indica</i> [42]                                | 0  | 0  | 0  | 0   | 1   |
| <i>Cosmobaris scolopacea</i> (Germar, 1819)                          | Chenopodiaceae [51]                                         | 0  | 0  | 0  | 0   | 1   |
| <i>Crepidodera plutus</i> (Latreille, 1804)                          | Genus <i>Salix</i> [43]                                     | 0  | 1  | 1  | 0   | 0   |
| <i>Hypera (Hypera) postica</i> (Gyllenhal, 1813)                     | Fabaceae [50]                                               | 0  | 0  | 0  | 1   | 0   |
| <i>Orthocephalus funestus</i> Jakovlev, 1881                         | <i>Artemisia indica</i> [41]                                | 0  | 0  | 0  | 3   | 10  |

|                                                                                    |                                                                                                                                                                          |     |      |      |      |      |
|------------------------------------------------------------------------------------|--------------------------------------------------------------------------------------------------------------------------------------------------------------------------|-----|------|------|------|------|
| <i>Nysius hidakai</i> Nakatani, 2015                                               | Other <i>Nysius</i> species usually use Asteraceae as a host [41]                                                                                                        | 3   | 0    | 0    | 51   | 0    |
| <i>Cassida piperata</i> Hope, 1842                                                 | <i>Achyranthes bidentata</i> var. <i>japonica</i> ,<br><i>Chenopodium album</i> var. <i>centrorubrum</i> ,<br><i>Amaranthus lividus</i> , <i>Commelina communis</i> [43] | 2   | 0    | 0    | 0    | 0    |
| <i>Apolygus spinolae</i> (Meyer-Dür, 1841)                                         | Polyphagy [41]                                                                                                                                                           | 0   | 0    | 0    | 7    | 2    |
| <i>Apis mellifera</i> Linnaeus, 1758                                               | Assumed polyphagy                                                                                                                                                        | 0   | 0    | 0    | 0    | 2    |
| <i>Dimorphopterus japonicus</i> (Hidaka, 1959)                                     | <i>Miscanthus sinensis</i> var. <i>purpurascens</i> ,<br><i>Phragmites japonica</i> [41]                                                                                 | 0   | 0    | 0    | 0    | 1    |
| <i>Deraeocoris</i> ( <i>Camptobrochis</i> ) <i>pulchellus</i> (Reuter, 1906)       | <i>Artemisia indica</i> and <i>Erigeron annuus</i> ([41]                                                                                                                 | 0   | 0    | 0    | 3    | 2    |
| <i>Ceutorhynchus</i> ( <i>Ceutorhynchus</i> ) <i>albosuturalis</i> (Roelofs, 1875) | Brassicaceae [57, 44]                                                                                                                                                    | 68  | 1    | 0    | 0    | 0    |
| <i>Heteraspis lewisii</i> Baly, 1874                                               | <i>Ampelopsis brevipedunculata</i> , <i>Vitis coignetiae</i> , <i>Parthenocissus tricuspidata</i> [43]                                                                   | 0   | 0    | 0    | 0    | 3    |
| Tenthredinidae sp.                                                                 | unknown                                                                                                                                                                  | 0   | 0    | 1    | 0    | 0    |
| <i>Gastrophysa atrocyanea</i> Motschulsky, 1860                                    | <i>Rumex crispus</i> and <i>Rumex japonicus</i> [12]                                                                                                                     | 0   | 1    | 0    | 0    | 1    |
| <i>Luprops orientalis</i> (Motschulsky, 1868)                                      | Other genus <i>Luprops</i> species exhibit polyphagy [64]                                                                                                                | 0   | 0    | 1    | 0    | 0    |
| <i>Capsus cinctus</i> (Kolenati, 1845)                                             | Recorded hosts are <i>Eleusine indica</i> and Genus <i>Calamagrostis</i> so Poaceae assumed as a host [54, 60]                                                           | 0   | 107  | 188  | 0    | 1    |
| Apionidae sp.                                                                      | unknown                                                                                                                                                                  | 0   | 0    | 1    | 0    | 0    |
| <i>Apolygus lucorum</i> (Meyer-Dür, 1843)                                          | Polyphagy but generally found on <i>Artemisia indica</i> [61, 41]                                                                                                        | 1   | 0    | 0    | 32   | 48   |
| <i>Ceutorhynchus</i> ( <i>Ceutorhynchus</i> ) <i>filiae</i> Dalla Torre, 1922      | Brassicaceae [57, 44]                                                                                                                                                    | 0   | 0    | 0    | 2    | 0    |
| <i>Metasalis populi</i> (Takeya, 1932)                                             | Genus <i>poplar</i> , <i>Platanus</i> , <i>Salix</i> , <i>Populus</i> [41]                                                                                               | 0   | 3    | 0    | 0    | 0    |
| <i>Nezara antennata</i> Scott, 1874                                                | Polyphagy but prefer Fabaceae [41]                                                                                                                                       | 0   | 1    | 0    | 0    | 0    |
| <i>Psylliodes</i> ( <i>Psylliodes</i> ) <i>attenuata</i> (Koch, 1803)              | <i>Humulus japonicus</i> [48]                                                                                                                                            | 199 | 257  | 0    | 8    | 0    |
| <i>Stenodema calcarata</i> (Fallén, 1807)                                          | Poaceae and Cyperaceae [41]                                                                                                                                              | 0   | 3    | 1    | 0    | 0    |
| <i>Psilarthroides czerskyi</i> (Zaslavskij, 1956)                                  | <i>Humulus japonicus</i> [44]                                                                                                                                            | 0   | 6    | 0    | 0    | 3    |
| <i>Cardipennis shaowuensis</i> (Voss, 1958)                                        | <i>Humulus japonicus</i> [44]                                                                                                                                            | 2   | 6    | 0    | 0    | 0    |
| Matching rate                                                                      |                                                                                                                                                                          | 100 | 82.6 | 66.7 | 87.5 | 66.7 |

**Table S2.** Vascular plant flora of Miho river by each plant species community

| Plant species                                                     | 2020<br><i>C. album</i> | 2020<br><i>B. syzigachne</i> | 2021<br><i>B. syzigachne</i> | 2020 A.<br><i>indica</i> | 2021 A.<br><i>indica</i> |
|-------------------------------------------------------------------|-------------------------|------------------------------|------------------------------|--------------------------|--------------------------|
| <i>Equisetum arvense</i> L.                                       |                         | 1                            | 1                            | 1                        | 1                        |
| <i>Salix koreensis</i> Andersson                                  |                         | 1                            | 1                            |                          |                          |
| <i>Morus alba</i> L.                                              |                         |                              |                              |                          | 1                        |
| <i>Humulus japonicus</i> Sieboid & Zucc.                          | 1                       | 1                            | 1                            |                          | 1                        |
| <i>Persicaria lapathifolia</i> (L.) Gray                          | 1                       |                              |                              |                          |                          |
| <i>Rumex crispus</i> L.                                           |                         | 1                            | 1                            | 1                        | 1                        |
| <i>Arenaria serpyllifolia</i> L.                                  |                         |                              |                              |                          | 1                        |
| <i>Stellaria alsine</i> var. <i>undulata</i> (Thunb.) Ohwi        | 1                       |                              |                              |                          |                          |
| <i>Humulus japonicus</i> Sieboid & Zucc.                          | 1                       | 1                            | 1                            |                          | 1                        |
| <i>Persicaria lapathifolia</i> (L.) Gray                          | 1                       |                              |                              |                          |                          |
| <i>Rumex crispus</i> L.                                           |                         | 1                            | 1                            | 1                        | 1                        |
| <i>Arenaria serpyllifolia</i> L.                                  |                         |                              |                              |                          | 1                        |
| <i>Stellaria alsine</i> var. <i>undulata</i> (Thunb.) Ohwi        | 1                       |                              |                              |                          |                          |
| <i>Stellaria aquatica</i> (L.) Scop.                              |                         |                              | 1                            |                          |                          |
| <i>Stellaria media</i> (L.) Vill.                                 |                         | 1                            |                              |                          |                          |
| <i>Chenopodium album</i> L.                                       | 1                       |                              | 1                            |                          | 1                        |
| <i>Chenopodium album</i> var. <i>centrorubrum</i> Makino          |                         | 1                            |                              | 1                        |                          |
| <i>Chenopodium bryoniaefolium</i> Bunge                           | 1                       |                              |                              |                          |                          |
| <i>Chenopodium ficifolium</i> Smith                               | 1                       |                              |                              |                          |                          |
| <i>Chenopodium glaucum</i> L.                                     | 1                       |                              |                              |                          |                          |
| <i>Ranunculus sceleratus</i> L.                                   | 1                       |                              |                              |                          |                          |
| <i>Menispermum dauricum</i> DC.                                   |                         |                              | 1                            |                          |                          |
| <i>Chelidonium majus</i> var. <i>asiaticum</i> (Hara) Ohwi        |                         | 1                            | 1                            | 1                        | 1                        |
| <i>Papaver rhoeas</i> L.                                          |                         |                              |                              | 1                        |                          |
| <i>Barbarea orthoceras</i> Ledeb.                                 | 1                       |                              |                              |                          |                          |
| <i>Brassica napus</i> L.                                          | 1                       |                              |                              |                          |                          |
| <i>Capsella bursapastoris</i> (L.) L.W.Medicus                    | 1                       | 1                            |                              |                          |                          |
| <i>Cardamine flexuosa</i> With.                                   | 1                       |                              |                              |                          |                          |
| <i>Descurainia pinnata</i> Britton                                | 1                       |                              |                              |                          |                          |
| <i>Descurainia sophia</i> (L.) Webb ex Prantl                     | 1                       |                              |                              |                          |                          |
| <i>Draba nemorosa</i> L.                                          | 1                       |                              |                              |                          |                          |
| <i>Lepidium sativum</i> L.                                        |                         |                              |                              | 1                        |                          |
| <i>Lepidium virginicum</i> L.                                     |                         |                              |                              | 1                        |                          |
| <i>Rorippa palustris</i> (Leyss.) Besser                          | 1                       |                              | 1                            |                          |                          |
| <i>Thlaspi arvense</i> L.                                         | 1                       | 1                            | 1                            |                          |                          |
| <i>Potentilla supina</i> L.                                       | 1                       |                              |                              |                          |                          |
| <i>Vicia amoena</i> Fisch. ex DC.                                 |                         |                              |                              | 1                        |                          |
| <i>Vicia angustifolia</i> var. <i>segetilis</i> (Thuill.) K.Koch. |                         |                              |                              | 1                        | 1                        |
| <i>Vicia villosa</i> Roth                                         |                         |                              |                              |                          | 1                        |

|                                                                           |   |   |   |   |
|---------------------------------------------------------------------------|---|---|---|---|
| <i>Oenothera biennis</i> L.                                               |   |   | 1 | 1 |
| <i>Anthriscus sylvestris</i> (L.) Hoffm.                                  |   | 1 |   |   |
| <i>Anthriscus sylvestris</i> var. <i>hirtifructus</i> (Ohwi) Hara         | 1 |   |   |   |
| <i>Oenanthe javanica</i> (Blume) DC.                                      |   | 1 |   |   |
| <i>Galium spurium</i> var. <i>echinospermon</i> (Wallr.) Hayek            | 1 | 1 |   | 1 |
| <i>Trigonotis peduncularis</i> (Trevir.) Benth. ex Hemsl.                 | 1 | 1 |   |   |
| <i>Lamium amplexicaule</i> L.                                             | 1 |   |   |   |
| <i>Leonurus japonicus</i> Houtt.                                          | 1 |   |   |   |
| <i>Scutellaria indica</i> L.                                              |   |   | 1 |   |
| <i>Mazus pumilus</i> (Burm.f.) Steenis                                    |   | 1 |   |   |
| <i>Veronica arvensis</i> L.                                               | 1 |   |   |   |
| <i>Veronica peregrina</i> L.                                              | 1 |   |   |   |
| <i>Veronica undulata</i> Wall.                                            | 1 |   |   |   |
| <i>Ambrosia artemisiifolia</i> L.                                         | 1 |   |   |   |
| <i>Artemisia indica</i> Willd.                                            | 1 |   | 1 | 1 |
| <i>Artemisia selengensis</i> Turcz. ex Besser                             |   | 1 |   |   |
| <i>Coreopsis lanceolata</i> L.                                            |   |   |   | 1 |
| <i>Erigeron annuus</i> (L.) Pers.                                         | 1 | 1 |   | 1 |
| <i>Hemistepta lyrata</i> Bunge                                            |   | 1 | 1 | 1 |
| <i>Ixeris polycephala</i> Cass.                                           |   |   | 1 | 1 |
| <i>Taraxacum officinale</i> Weber                                         |   |   | 1 |   |
| <i>Youngia japonica</i> (L.) DC.                                          |   | 1 |   |   |
| <i>Agrostis dimorpholemma</i> Ohwi                                        |   |   |   | 1 |
| <i>Alopecurus aequalis</i> Sobol.                                         | 1 | 1 |   |   |
| <i>Beckmannia syzigachne</i> (Steud.) Fernald                             | 1 | 1 |   |   |
| <i>Bromus japonicus</i> Thunb.                                            |   | 1 |   | 1 |
| <i>Miscanthus sinensis</i> var. <i>purpurascens</i> (Andersson)<br>Rendle | 1 |   |   |   |
| <i>Phragmites communis</i> Trin.                                          | 1 |   |   |   |
| <i>Phragmites japonica</i> Steud.                                         | 1 |   |   | 1 |
| <i>Poa pratensis</i> L.                                                   | 1 |   |   |   |
| <i>Carex aphanolepis</i> Franch. & Sav.                                   |   |   | 1 |   |
| <i>Carex breviculmis</i> R.Br.                                            | 1 |   |   |   |
| <i>Carex glabrescens</i> Ohwi                                             | 1 |   | 1 |   |
| <i>Carex miyabei</i> Franch.                                              | 1 |   | 1 |   |
| <i>Stellaria aquatica</i> (L.) Scop.                                      |   | 1 |   |   |
| <i>Stellaria media</i> (L.) Vill.                                         | 1 |   |   |   |
| <i>Chenopodium album</i> L.                                               | 1 | 1 |   | 1 |
| <i>Chenopodium album</i> var. <i>centrorubrum</i> Makino                  | 1 |   | 1 |   |
| <i>Chenopodium bryoniaefolium</i> Bunge                                   | 1 |   |   |   |
| <i>Chenopodium ficifolium</i> Smith                                       | 1 |   |   |   |
| <i>Chenopodium glaucum</i> L.                                             | 1 |   |   |   |
| <i>Ranunculus sceleratus</i> L.                                           | 1 |   |   |   |

|                                                                   |   |   |   |   |   |
|-------------------------------------------------------------------|---|---|---|---|---|
| <i>Menispermum dauricum</i> DC.                                   |   |   | 1 |   |   |
| <i>Chelidonium majus</i> var. <i>asiaticum</i> (Hara) Ohwi        | 1 |   | 1 | 1 | 1 |
| <i>Papaver rhoeas</i> L.                                          |   |   |   | 1 |   |
| <i>Barbarea orthoceras</i> Ledeb.                                 | 1 |   |   |   |   |
| <i>Brassica napus</i> L.                                          | 1 |   |   |   |   |
| <i>Capsella bursapastoris</i> (L.) L.W.Medicus                    | 1 | 1 |   |   |   |
| <i>Cardamine flexuosa</i> With.                                   | 1 |   |   |   |   |
| <i>Descurainia pinnata</i> Britton                                | 1 |   |   |   |   |
| <i>Descurainia sophia</i> (L.) Webb ex Prantl                     | 1 |   |   |   |   |
| <i>Draba nemorosa</i> L.                                          | 1 |   |   |   |   |
| <i>Lepidium sativum</i> L.                                        |   |   |   | 1 |   |
| <i>Lepidium virginicum</i> L.                                     |   |   |   | 1 |   |
| <i>Rorippa palustris</i> (Leyss.) Besser                          | 1 |   | 1 |   |   |
| <i>Thlaspi arvense</i> L.                                         | 1 | 1 | 1 |   |   |
| <i>Potentilla supina</i> L.                                       | 1 |   |   |   |   |
| <i>Vicia amoena</i> Fisch. ex DC.                                 |   |   |   | 1 |   |
| <i>Vicia angustifolia</i> var. <i>segetilis</i> (Thuill.) K.Koch. |   |   |   | 1 | 1 |
| <i>Vicia villosa</i> Roth                                         |   |   |   |   | 1 |
| <i>Oenothera biennis</i> L.                                       |   |   |   | 1 | 1 |
| <i>Anthriscus sylvestris</i> (L.) Hoffm.                          |   |   | 1 |   |   |
| <i>Anthriscus sylvestris</i> var. <i>hirtifructus</i> (Ohwi) Hara | 1 |   |   |   |   |
| <i>Oenanthe javanica</i> (Blume) DC.                              |   |   | 1 |   |   |
| <i>Galium spurium</i> var. <i>echinospermon</i> (Wallr.) Hayek    |   | 1 | 1 |   | 1 |
| <i>Trigonotis peduncularis</i> (Trevir.) Benth. ex Hemsl.         | 1 |   | 1 |   |   |
| <i>Lamium amplexicaule</i> L.                                     | 1 |   |   |   |   |
| <i>Leonurus japonicus</i> Houtt.                                  |   | 1 |   |   |   |
| <i>Scutellaria indica</i> L.                                      |   |   |   | 1 |   |
| <i>Mazus pumilus</i> (Burm.f.) Steenis                            |   |   | 1 |   |   |
| <i>Veronica arvensis</i> L.                                       | 1 |   |   |   |   |
| <i>Veronica peregrina</i> L.                                      | 1 |   |   |   |   |
| <i>Veronica undulata</i> Wall.                                    | 1 |   |   |   |   |
| <i>Ambrosia artemisiifolia</i> L.                                 | 1 |   |   |   |   |
| <i>Artemisia indica</i> Willd.                                    |   | 1 |   | 1 | 1 |
| <i>Artemisia selengensis</i> Turcz. ex Besser                     |   |   | 1 |   |   |
| <i>Coreopsis lanceolata</i> L.                                    |   |   |   |   | 1 |
| <i>Erigeron annuus</i> (L.) Pers.                                 | 1 |   | 1 |   | 1 |
| <i>Hemistepta lyrata</i> Bunge                                    |   |   | 1 | 1 | 1 |
| <i>Ixeris polycephala</i> Cass.                                   |   |   |   | 1 | 1 |
| <i>Taraxacum officinale</i> Weber                                 |   |   |   | 1 |   |
| <i>Youngia japonica</i> (L.) DC.                                  |   |   | 1 |   |   |
| <i>Agrostis dimorpholemma</i> Ohwi                                |   |   |   |   | 1 |
| <i>Alopecurus aequalis</i> Sobol.                                 | 1 |   | 1 |   |   |
| <i>Beckmannia syzigachne</i> (Steud.) Fernald                     |   | 1 | 1 |   |   |

|                                                                 |   |   |   |   |
|-----------------------------------------------------------------|---|---|---|---|
| <i>Bromus japonicus</i> Thunb.                                  |   | 1 |   | 1 |
| <i>Miscanthus sinensis</i> var. <i>purpurascens</i> (Andersson) |   |   |   |   |
| Rendle                                                          | 1 |   |   |   |
| <i>Phragmites communis</i> Trin.                                |   | 1 |   |   |
| <i>Phragmites japonica</i> Steud.                               | 1 |   |   | 1 |
| <i>Poa pratensis</i> L.                                         |   | 1 |   |   |
| <i>Carex aphanolepis</i> Franch. & Sav.                         |   |   | 1 |   |
| <i>Carex breviculmis</i> R.Br.                                  |   | 1 |   |   |
| <i>Carex glabrescens</i> Ohwi                                   |   | 1 | 1 |   |
| <i>Carex miyabei</i> Franch.                                    |   | 1 | 1 |   |
| <i>Carex neurocarpa</i> Maxim.                                  |   |   |   | 1 |

**Table S3.** Insect fauna of Miho river by each plant species community

| Insect species                                                                      | 2020<br><i>C. album</i> | 2020<br><i>B. syzigachne</i> | 2021<br><i>B. syzigachne</i> | 2020 <i>A.</i><br><i>indica</i> | 2021 <i>A.</i><br><i>indica</i> |
|-------------------------------------------------------------------------------------|-------------------------|------------------------------|------------------------------|---------------------------------|---------------------------------|
| <i>Stricticollis valgipes</i> (Marseul, 1875)                                       |                         |                              |                              |                                 | 6                               |
| Apionidae sp.                                                                       |                         |                              | 1                            |                                 |                                 |
| <i>Cantharis</i> ( <i>Cyrtomoptila</i> ) <i>plagiata</i> Heyden, 1889               | 5                       | 38                           | 7                            | 20                              | 35                              |
| <i>Chlaenius</i> ( <i>Lissauchenius</i> ) <i>naeviger</i> Morawitz, 1862            |                         |                              |                              |                                 | 1                               |
| <i>Agapanthia</i> ( <i>Epoetes</i> ) <i>amurensis</i> Kraatz, 1879                  |                         |                              |                              |                                 | 1                               |
| <i>Cassida nebulosa</i> Linnaeus, 1758                                              | 2                       |                              |                              |                                 |                                 |
| <i>Cassida piperata</i> Hope, 1842                                                  | 2                       |                              |                              |                                 |                                 |
| <i>Chrysolina</i> ( <i>Anopachys</i> ) <i>aurichalcea</i> (Mannerheim, 1825)        |                         |                              |                              |                                 | 1                               |
| <i>Chrysomela vigintipunctata</i> (Scopoli, 1763)                                   |                         |                              | 1                            |                                 |                                 |
| Chrysomelidae sp.                                                                   |                         |                              | 3                            |                                 | 17                              |
| <i>Crepidodera plutus</i> (Latreille, 1804)                                         |                         | 1                            | 1                            |                                 |                                 |
| <i>Fleutiauxia armata</i> (Baly, 1874)                                              |                         | 1                            |                              |                                 |                                 |
| <i>Galerucella</i> ( <i>Galerucella</i> ) <i>grisea</i> (Joannis, 1865)             | 1                       |                              |                              |                                 |                                 |
| <i>Gastrophysa atrocyanea</i> Motschulsky, 1860                                     |                         | 1                            |                              |                                 | 1                               |
| <i>Heteraspis lewisii</i> Baly, 1874                                                |                         |                              |                              |                                 | 3                               |
| <i>Lema</i> ( <i>Lema</i> ) <i>concinnipennis</i> Baly, 1865                        |                         | 1                            |                              |                                 |                                 |
| <i>Plagiodera versicolora</i> (Laicharting, 1781)                                   |                         |                              | 2                            |                                 |                                 |
| <i>Psylliodes</i> ( <i>Psylliodes</i> ) <i>attenuata</i> (Koch, 1803)               | 199                     | 257                          |                              | 8                               |                                 |
| <i>Calvia mui</i> (Timberlake, 1943)                                                |                         |                              | 2                            |                                 |                                 |
| <i>Harmonia axyridis</i> (Pallas, 1773)                                             |                         |                              |                              | 1                               |                                 |
| <i>Hippodamia</i> ( <i>Hemisphaerica</i> ) <i>tredecimpunctata</i> (Linnaeus, 1758) | 1                       |                              |                              |                                 |                                 |
| <i>Nephus</i> ( <i>Bipunctus</i> ) <i>incinctus</i> (Mulsant, 1850)                 |                         |                              |                              |                                 | 1                               |
| <i>Propylea japonica</i> (Thunberg, 1781)                                           | 6                       | 6                            | 7                            | 35                              | 27                              |
| <i>Scymnus</i> ( <i>Neopullus</i> ) <i>babai</i> Sasaji, 1971                       |                         |                              | 5                            |                                 |                                 |
| <i>Scymnus</i> ( <i>Pullus</i> ) <i>posticalis</i> Scard, 1912                      |                         |                              | 1                            |                                 | 1                               |
| Cryptophagidae sp.                                                                  |                         |                              |                              |                                 | 1                               |
| <i>Cardipennis shaowuensis</i> (Voss, 1958)                                         | 2                       | 6                            |                              |                                 |                                 |

|                                                                                    |    |    |    |     |     |
|------------------------------------------------------------------------------------|----|----|----|-----|-----|
| <i>Cardipennis sulcithorax</i> (Hustache, 1916)                                    |    | 3  |    | 6   |     |
| <i>Ceutorhynchus</i> ( <i>Ceutorhynchus</i> ) <i>albosuturalis</i> (Roelofs, 1875) | 68 | 1  |    |     |     |
| <i>Ceutorhynchus</i> ( <i>Ceutorhynchus</i> ) <i>filiae</i> Dalla Torre, 1922      |    |    |    | 2   |     |
| <i>Cosmobaris scolopacea</i> (Germar, 1819)                                        |    |    |    |     | 1   |
| <i>Dorytomus</i> ( <i>Dorytomus</i> ) <i>imbecillus</i> Faust, 1883                |    | 17 | 29 |     |     |
| <i>Dorytomus</i> ( <i>Dorytomus</i> ) <i>roelofsi</i> Faust, 1882                  |    |    | 1  |     |     |
| <i>Hypera</i> ( <i>Hypera</i> ) <i>postica</i> (Gyllenhal, 1813)                   |    |    |    | 1   |     |
| <i>Psilarthroides czerskyi</i> (Zaslavskij, 1956)                                  |    | 6  |    |     | 3   |
| Elateridae sp.                                                                     |    |    |    |     | 1   |
| <i>Lissorhoptrus oryzophilus</i> Kuschel, 1952                                     |    | 1  |    |     | 1   |
| Lathridiidae sp. 1                                                                 |    |    | 1  |     |     |
| Lathridiidae sp. 2                                                                 |    |    |    |     | 2   |
| <i>Malachius</i> ( <i>Malachius</i> ) <i>prolongatus</i> Motschulsky, 1866         | 2  | 1  |    | 12  | 4   |
| Mordellidae sp.                                                                    |    |    |    |     | 3   |
| <i>Psammoecus</i> sp.                                                              |    |    |    |     | 5   |
| Silvanidae sp.                                                                     |    |    |    |     | 2   |
| <i>Paederus</i> ( <i>Heteropaederus</i> ) <i>fuscipes</i> Curtis, 1826             | 1  |    |    |     |     |
| <i>Luprops orientalis</i> (Motschulsky, 1868)                                      |    |    | 1  |     |     |
| Asilidae sp.                                                                       |    |    |    |     | 1   |
| <i>Chlorops oryzae</i> Matsumura, 1915                                             |    | 10 | 8  |     | 45  |
| <i>Dolichopus nitidus</i> Fallen, 1823                                             |    |    | 3  | 26  | 219 |
| <i>Sciasminettia similis</i> Shatalkin, 2000                                       |    |    |    |     | 1   |
| <i>Colobaea</i> sp.                                                                |    |    |    |     | 1   |
| <i>Sepedon aenescens</i> Wiedemann, 1830                                           |    | 1  |    |     |     |
| <i>Sphaerophoria menthastri</i> (Linnaeus, 1758)                                   |    |    | 2  |     |     |
| Tephritidae sp.                                                                    |    |    | 1  |     |     |
| <i>Amphiareus obscuriceps</i> (Poppius, 1909)                                      |    |    |    |     | 1   |
| Anthocoridae sp.                                                                   |    |    |    |     | 92  |
| <i>Orius</i> ( <i>Heterorius</i> ) <i>sauteri</i> (Poppius, 1909)                  |    |    |    | 31  |     |
| <i>Metatropis tesongsanicus</i> Josifov, 1975                                      |    | 1  |    |     |     |
| <i>Austroasca vittata</i> (Lethierry, 1884)                                        |    |    |    | 776 | 625 |
| <i>Cicadella viridis</i> (Linnaeus, 1758)                                          |    |    |    |     | 1   |
| Cicadellidae sp. 1                                                                 |    |    |    |     | 25  |
| Cicadellidae sp. 2                                                                 |    |    |    |     | 2   |
| Cicadellidae sp. 3                                                                 |    |    |    |     | 1   |
| Cicadellidae sp. 4                                                                 |    |    | 3  |     |     |
| Cicadellidae sp. 5                                                                 |    |    | 2  |     |     |
| <i>Dryodurgades lamellaris</i> Vilbaste, 1968                                      |    |    |    |     | 4   |
| <i>Goniagnathus</i> ( <i>Epitephra</i> ) <i>rugulosus</i> (Haupt, 1917)            |    |    |    | 1   | 2   |
| <i>Macrosteles brunnescens</i> Anufriev, 1968                                      |    |    |    |     | 10  |
| <i>Metalimnus steini</i> (Fieber, 1869)                                            |    |    | 1  |     |     |
| <i>Nakaharanus sagittarius</i> Kwon and Lee, 1979                                  |    |    |    |     | 3   |
| <i>Ziczacella steggerdai</i> (Ross, 1965)                                          |    | 11 | 3  |     |     |



|                                                                              |    |     |     |     |     |
|------------------------------------------------------------------------------|----|-----|-----|-----|-----|
| <i>Acanthocoris sordidus</i> (Thunberg, 1783)                                |    |     |     |     | 2   |
| <i>Cletus punctiger</i> (Dallas, 1852)                                       | 1  |     |     |     |     |
| <i>Geotomus pygmaeus</i> (Dallas, 1851)                                      |    |     | 1   |     |     |
| <i>Dimorphopterus japonicus</i> (Hidaka, 1959)                               |    |     |     |     | 1   |
| <i>Geocoris</i> ( <i>Piocoris</i> ) <i>varius</i> (Uhler, 1860)              |    |     |     |     | 1   |
| <i>Nysius plebejus</i> Distant, 1883                                         | 3  |     |     | 51  |     |
| <i>Pachygrontha antennata</i> (Uhler, 1860)                                  | 1  |     |     |     | 1   |
| <i>Stigmatonotum rufipes</i> (Motschulsky, 1866)                             |    | 1   |     |     | 1   |
| <i>Apolygus lucorum</i> (Meyer-Dür, 1843)                                    | 1  |     |     | 32  | 48  |
| <i>Apolygus spinolae</i> (Meyer-Dür, 1841)                                   |    |     |     | 7   | 2   |
| <i>Capsus cinctus</i> (Kolenati, 1845)                                       |    | 107 | 188 |     | 1   |
| <i>Deraeocoris</i> ( <i>Camptobrochis</i> ) <i>pulchellus</i> (Reuter, 1906) |    |     |     | 3   | 2   |
| <i>Europiella artemisiae</i> (Becker, 1864)                                  |    | 1   |     | 207 | 419 |
| <i>Orthocephalus funestus</i> Jakovlev, 1881                                 |    |     |     | 3   | 10  |
| <i>Orthotylus flavosparsus</i> (Sahlberg, 1841)                              | 83 | 5   |     |     |     |
| <i>Plagiognathus amurensis</i> Reuter, 1883                                  | 23 | 28  | 1   | 18  |     |
| <i>Plagiognathus yomogi</i> Miyamoto, 1969                                   |    |     |     |     | 31  |
| <i>Polymerus</i> ( <i>Polymerus</i> ) <i>amurensis</i> Kerzhner, 1988        |    | 5   |     |     |     |
| <i>Psallus</i> ( <i>Calopsallus</i> ) <i>clarus</i> Kerzhner, 1988           |    |     |     | 1   |     |
| <i>Stenodema calcarata</i> (Fallén, 1807)                                    |    | 3   | 1   |     |     |
| <i>Taylorilygus apicalis</i> (Fieber, 1861)                                  |    |     |     |     | 12  |
| <i>Orthezia urticae</i> (Linnaeus, 1758)                                     |    |     |     | 29  |     |
| <i>Eysarcoris gibbosus</i> Jakovlev, 1904                                    |    |     | 1   |     |     |
| <i>Nezara antennata</i> Scott, 1874                                          |    | 1   |     |     |     |
| <i>Zicrona caerulea</i> (Linnaeus, 1758)                                     |    |     |     |     | 3   |
| <i>Piesma capitatum</i> (Wolff, 1804)                                        | 16 |     |     |     |     |
| <i>Rhopalus</i> ( <i>Aeschyntelus</i> ) <i>maculatus</i> (Fieber, 1837)      |    |     |     | 1   |     |
| <i>Corythucha marmorata</i> Uhler, 1878                                      |    | 1   | 3   |     | 58  |
| <i>Metasalis populi</i> (Takeya, 1932)                                       |    | 3   |     |     |     |
| Apidae sp.                                                                   |    |     |     |     | 1   |
| <i>Apis mellifera</i> Linnaeus, 1758                                         |    |     |     |     | 2   |
| <i>Eucera</i> ( <i>Eucera</i> ) <i>sociabilis</i> (Smith, 1873)              |    |     |     |     | 1   |
| Argidae sp.                                                                  |    |     | 1   |     |     |
| <i>Nylanderia flavipes</i> (Smith, 1874)                                     |    |     |     |     | 1   |
| <i>Nylanderia sakurae</i> (Ito, 1914)                                        |    |     |     |     | 1   |
| <i>Tetramorium tsushimae</i> Emery, 1925                                     |    |     |     | 71  | 177 |
| Ichneumonidae sp.                                                            |    |     | 3   |     | 2   |
| <i>Polistes snelleni</i> Saussure, 1862                                      |    |     |     | 1   |     |
| <i>Paracercion calamorum</i> (Ris, 1916)                                     |    | 2   |     |     |     |

**Table S4.** Comparison table of the Sørensen similarity indices for the terrestrial insects in each plant community with sampling units from 2020

| Sørensen similarity  |    | <i>C. album</i> |             |      | <i>B. syzigachne</i> |             |      | <i>A. indica</i> |             |    |
|----------------------|----|-----------------|-------------|------|----------------------|-------------|------|------------------|-------------|----|
|                      |    | a               | b           | ab   | a                    | b           | ab   | a                | b           | ab |
| <i>C. album</i>      | a  |                 |             |      |                      |             |      |                  |             |    |
|                      | b  | <b>0.62</b>     |             |      |                      |             |      |                  |             |    |
|                      | ab | <b>0.71</b>     | <b>0.94</b> |      |                      |             |      |                  |             |    |
| <i>B. syzigachne</i> | a  | 0.30            | 0.36        | 0.34 |                      |             |      |                  |             |    |
|                      | b  | 0.28            | 0.34        | 0.32 | <b>0.62</b>          |             |      |                  |             |    |
|                      | ab | 0.31            | 0.36        | 0.34 | <b>0.88</b>          | <b>0.79</b> |      |                  |             |    |
| <i>A. indica</i>     | a  | 0.21            | 0.35        | 0.33 | 0.20                 | 0.27        | 0.26 |                  |             |    |
|                      | b  | 0.25            | 0.37        | 0.35 | 0.22                 | 0.29        | 0.27 | <b>0.80</b>      |             |    |
|                      | ab | 0.24            | 0.35        | 0.33 | 0.21                 | 0.28        | 0.26 | <b>0.86</b>      | <b>0.96</b> |    |

\*a, initial 50 sweeps over 25 m; b, final 50 sweeps over 25 m; ab, 100 sweep total over 50 m. \*Values above 0.5 are provided in bold.

**Table S5.** Comparison table of the Bray–Curtis similarity indices for the terrestrial insects among the plant communities with sampling units from 2020

| Bray–Curtis similarity |    | <i>C. album</i> |             |             | <i>B. syzigachne</i> |             |      | <i>A. indica</i> |             |    |
|------------------------|----|-----------------|-------------|-------------|----------------------|-------------|------|------------------|-------------|----|
|                        |    | a               | b           | ab          | a                    | b           | ab   | a                | b           | ab |
| <i>C. album</i>        | a  |                 |             |             |                      |             |      |                  |             |    |
|                        | b  | <b>0.44</b>     |             |             |                      |             |      |                  |             |    |
|                        | ab | <b>0.56</b>     | <b>0.76</b> |             |                      |             |      |                  |             |    |
| <i>B. syzigachne</i>   | a  | <b>0.37</b>     | <b>0.46</b> | <b>0.53</b> |                      |             |      |                  |             |    |
|                        | b  | <b>0.54</b>     | <b>0.52</b> | <b>0.38</b> | <b>0.58</b>          |             |      |                  |             |    |
|                        | ab | <b>0.29</b>     | <b>0.39</b> | <b>0.52</b> | <b>0.80</b>          | <b>0.51</b> |      |                  |             |    |
| <i>A. indica</i>       | a  | 0.02            | 0.03        | 0.04        | 0.04                 | 0.04        | 0.04 |                  |             |    |
|                        | b  | 0.04            | 0.09        | 0.08        | 0.06                 | 0.10        | 0.08 | <b>0.64</b>      |             |    |
|                        | ab | 0.02            | 0.05        | 0.05        | 0.05                 | 0.06        | 0.06 | <b>0.77</b>      | <b>0.55</b> |    |

\*a, initial 50 sweeps over 25 m; b, final 50 sweeps over 25 m; ab, total of 100 sweeps over 50 m. \*Values above 0.1 are in bold.

**Table S6.** Comparison table of the Sørensen similarity indices for the terrestrial insects among the plant communities and years

| Sørensen similarity          | <i>B. syzigachne</i><br>2020 | <i>B. syzigachne</i><br>2021 | <i>A. indica</i><br>2020 | <i>A. indica</i><br>2021 |
|------------------------------|------------------------------|------------------------------|--------------------------|--------------------------|
| <i>B. syzigachne</i><br>2020 | 0.34                         |                              |                          |                          |
| <i>B. syzigachne</i><br>2021 |                              |                              |                          |                          |
| <i>A. indica</i><br>2020     | 0.26                         | 0.15                         | 0.29                     |                          |
| <i>A. indica</i><br>2021     | 0.25                         | 0.2                          |                          |                          |

**Table S7.** Comparison table of the Bray–Curtis similarity indices for the terrestrial insects among the plant communities and years

| Bray–Curtis<br>similarity    | <i>B. syzigachne</i><br>2020 | <i>B. syzigachne</i><br>2021 | <i>A. indica</i><br>2020 | <i>A. indica</i><br>2021 |
|------------------------------|------------------------------|------------------------------|--------------------------|--------------------------|
| <i>B. syzigachne</i><br>2020 | <b>0.38</b>                  |                              |                          |                          |
| <i>B. syzigachne</i><br>2021 |                              |                              |                          |                          |
| <i>A. indica</i><br>2020     | 0.06                         | 0.02                         | <b>0.62</b>              |                          |
| <i>A. indica</i><br>2021     | 0.05                         | 0.03                         |                          |                          |

\*Values above 0.1 are highlighted in bold.

**Table S8.** The number of species by the sampling in 2020

|                       | <i>C. album</i> |     | <i>B. syzigachne</i> |     | <i>A. indica</i> |     |
|-----------------------|-----------------|-----|----------------------|-----|------------------|-----|
| Sample tag            | a               | b   | a                    | b   | a                | b   |
| Number of species     | 10              | 16  | 23                   | 19  | 18               | 22  |
| Number of individuals | 164             | 253 | 344                  | 176 | 832              | 511 |

\*a : initial 50 sweeps over 25 m. b: final 50 sweeps over 25 m.

**Table S9.** The number of species by the sampling in 2021

| Plant community and sampling unit order number | Number of species | Number of individuals |
|------------------------------------------------|-------------------|-----------------------|
| <i>B. syzigachne</i> 1                         | 8                 | 25                    |
| <i>B. syzigachne</i> 2                         | 6                 | 15                    |
| <i>B. syzigachne</i> 3                         | 5                 | 28                    |
| <i>B. syzigachne</i> 4                         | 9                 | 23                    |
| <i>B. syzigachne</i> 5                         | 5                 | 16                    |
| <i>B. syzigachne</i> 6                         | 5                 | 23                    |
| <i>B. syzigachne</i> 7                         | 11                | 47                    |
| <i>B. syzigachne</i> 8                         | 5                 | 31                    |
| <i>B. syzigachne</i> 9                         | 11                | 47                    |
| <i>B. syzigachne</i> 10                        | 10                | 29                    |
| <i>A. indica</i> 1                             | 24                | 253                   |
| <i>A. indica</i> 2                             | 24                | 358                   |
| <i>A. indica</i> 3                             | 16                | 166                   |
| <i>A. indica</i> 4                             | 22                | 199                   |
| <i>A. indica</i> 5                             | 23                | 162                   |
| <i>A. indica</i> 6                             | 22                | 123                   |
| <i>A. indica</i> 7                             | 22                | 154                   |
| <i>A. indica</i> 8                             | 17                | 221                   |
| <i>A. indica</i> 9                             | 23                | 178                   |
| <i>A. indica</i> 10                            | 16                | 113                   |
